# Supplementary material for: Analysis of BRCT5 domain-containing proteins reveals a new component of DNA damage repair in Arabidopsis
Source: PubMed Central journal article supplement (PMC9791218; doi:10.3389/fpls.2022.1023358), 2022-12-12
Supplement: DataSheet_1.pdf [file DataSheet_1.pdf]

## Supplementary materials

### **Analysis of BRCT5 domain containing proteins reveals a new component of DNA damage repair in Arabidopsis**

**Jovanka Vladejić<sup>1</sup>, Fen Yang<sup>1,2</sup>, Eva Dvořák Tomaščíková<sup>1</sup>, Jaroslav Doležel<sup>1</sup>, Jan J. Paleček<sup>3</sup>, Ales Pecinka<sup>1,2,\*</sup>**

<sup>1</sup> Institute of Experimental Botany (IEB), Czech Acad Sci, Centre of the Region Haná for Biotechnological and Agricultural Research (CRH), Šlechtitelů 31, 77900 Olomouc, Czech Republic, <sup>2</sup> Department of Cell Biology and Genetics, Faculty of Science, Palacký University, Šlechtitelů 27, 77900 Olomouc, Czech Republic, <sup>3</sup> National Centre for Biomolecular Research (NCBR), Faculty of Science, Masaryk University, Kamenice 5, 62500 Brno, Czech Republic

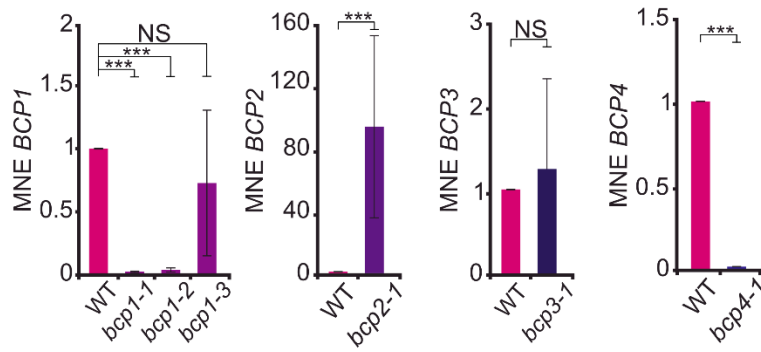

**Supplementary Figure 1** | Expression of BCP genes in the respective *bcp* mutants. Reverse transcription qPCR analysis of *BCP1*, *BCP2*, *BCP3* and *BCP4* expression in wild-type (WT) and respective *bcp* mutant plants under ambient conditions. Y-axis shows mean normalized expression relative to *PP2A*. Error bars show three biological replicates. NS = not significantly different, \*\*\*  $P < 0.001$  statistical difference in Mann-Whitney U-test at  $P < 0.05$ .

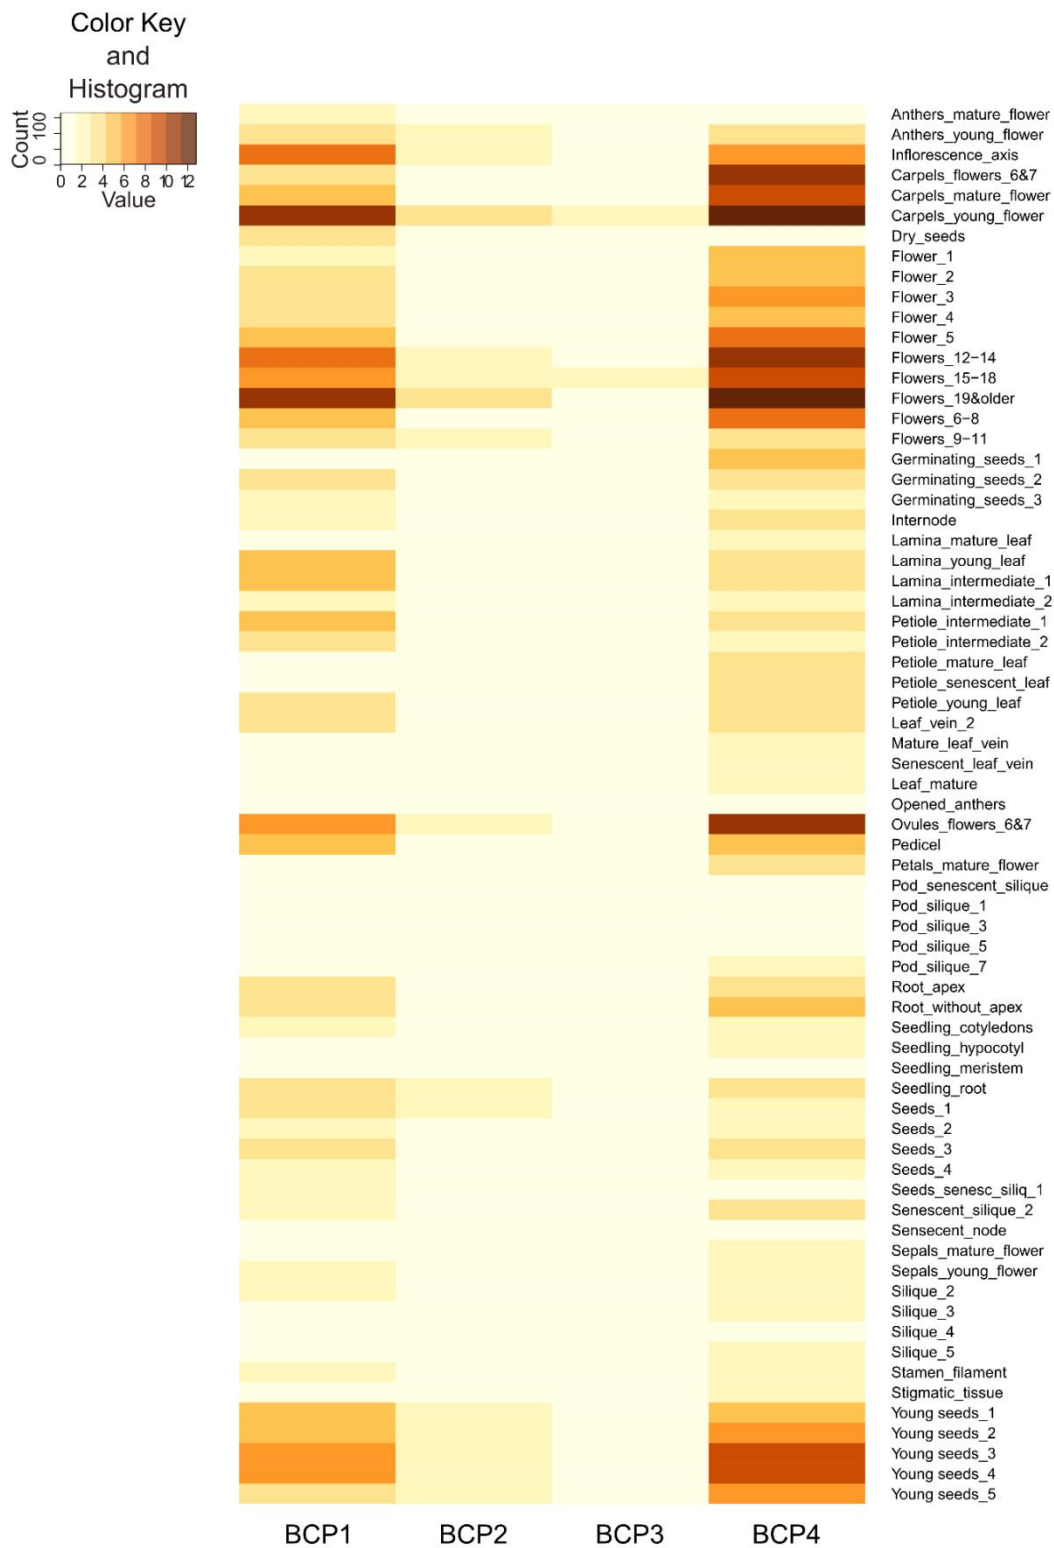

**Supplementary Figure 2** | Expression of BCP genes during plant development. The expression values for individual genes on x-axis correspond to number of fragments per kilobase per million (FPKM). The y-axis shows individual tissues. The expression values were retrieved from a public dataset (Klepikova et al., 2016).

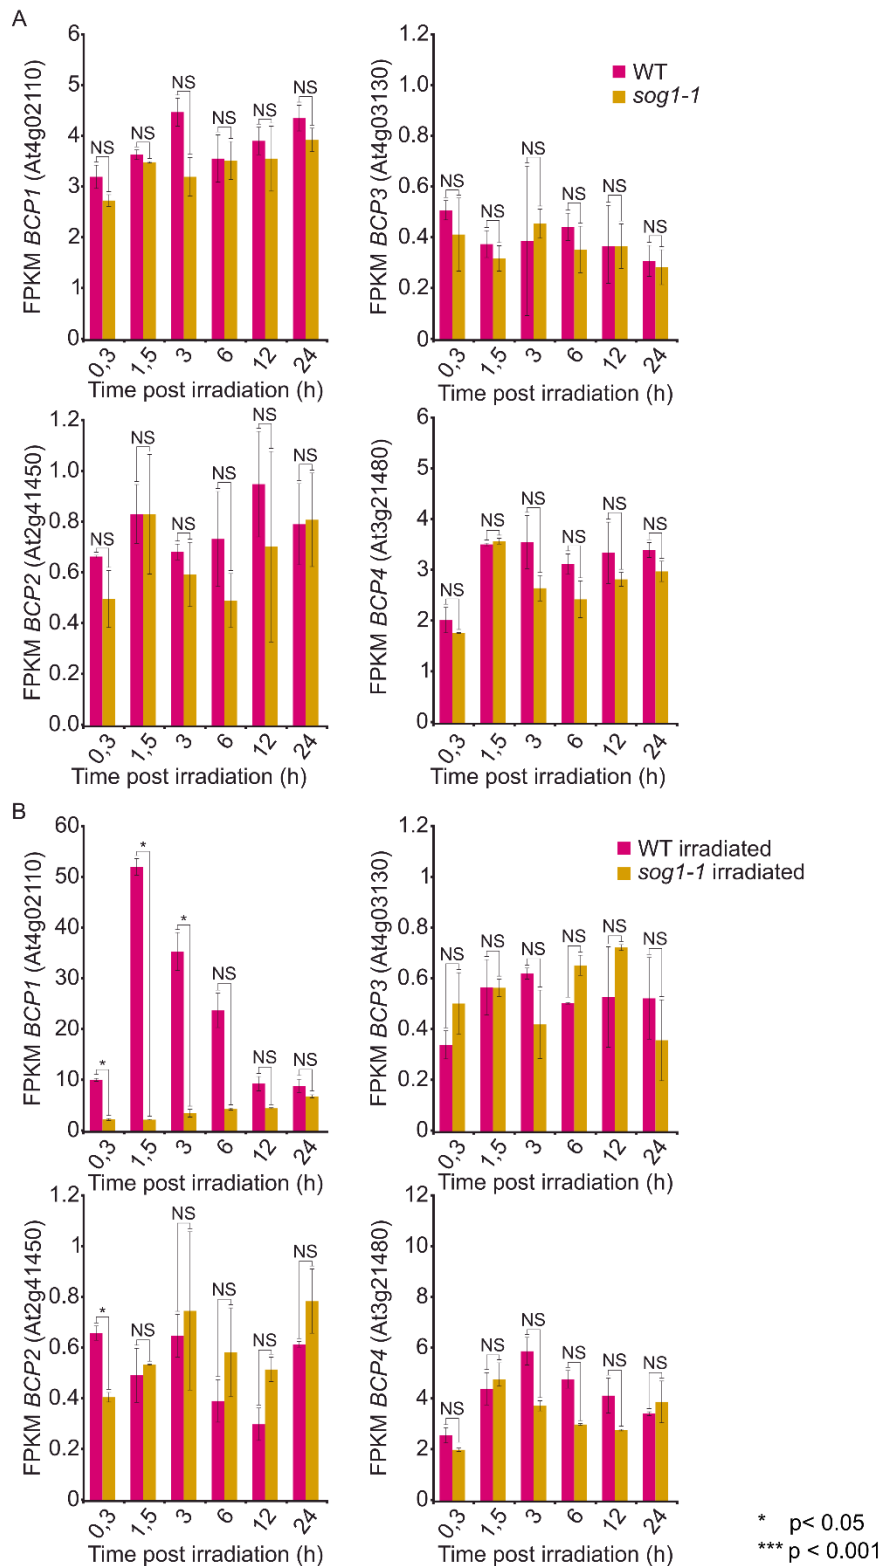

**Supplementary Figure 3 | (A)** Expression of BCP genes under mock conditions in wild-type and *sog1-1* plants. **(B)** Expression of BCP genes after gamma irradiation in wild type and *sog1-1* plants. The x-axis shows different sampling times after gamma irradiation (hours) and the y-axis shows a number of fragments per kilobase per million (FPKM). Asterisks represent significant differences in two sample T-test with unequal variance, \* P < 0.05, \*\*\* P < 0.001, NS – not significantly different. The expression values were extracted from the public dataset (Bourbousse et al., 2018).

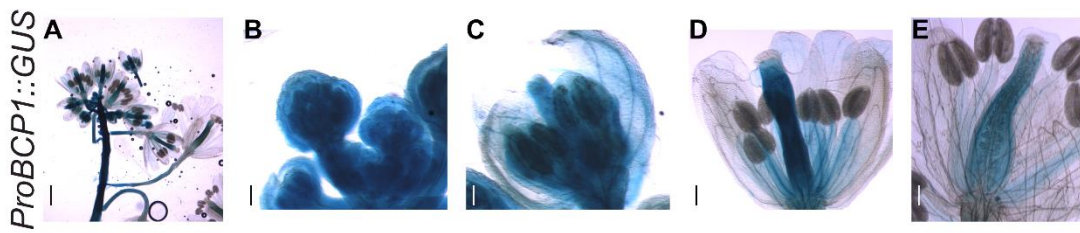

**Supplementary Figure 4** | *In planta* analysis of *BCP1* expression in flower organs. Stable transformants carrying *ProBCP1::GUS* were grown in soil until flowering. Expression of *BCP1* was monitored after GUS histochemical staining of the inflorescences. Representative pictures showing the tissues with *BCP1* expression. (A) Full inflorescence. Scale bar = 1 mm. (B) Closed young flowers. Scale bar = 100 µm. (C) Young open flower. Scale bar = 200 µm. (D) Open flower with anthers and pistil. Scale bar = 100 µm. (E) Old flower with anthers and pistil. Scale bar = 200 µm.

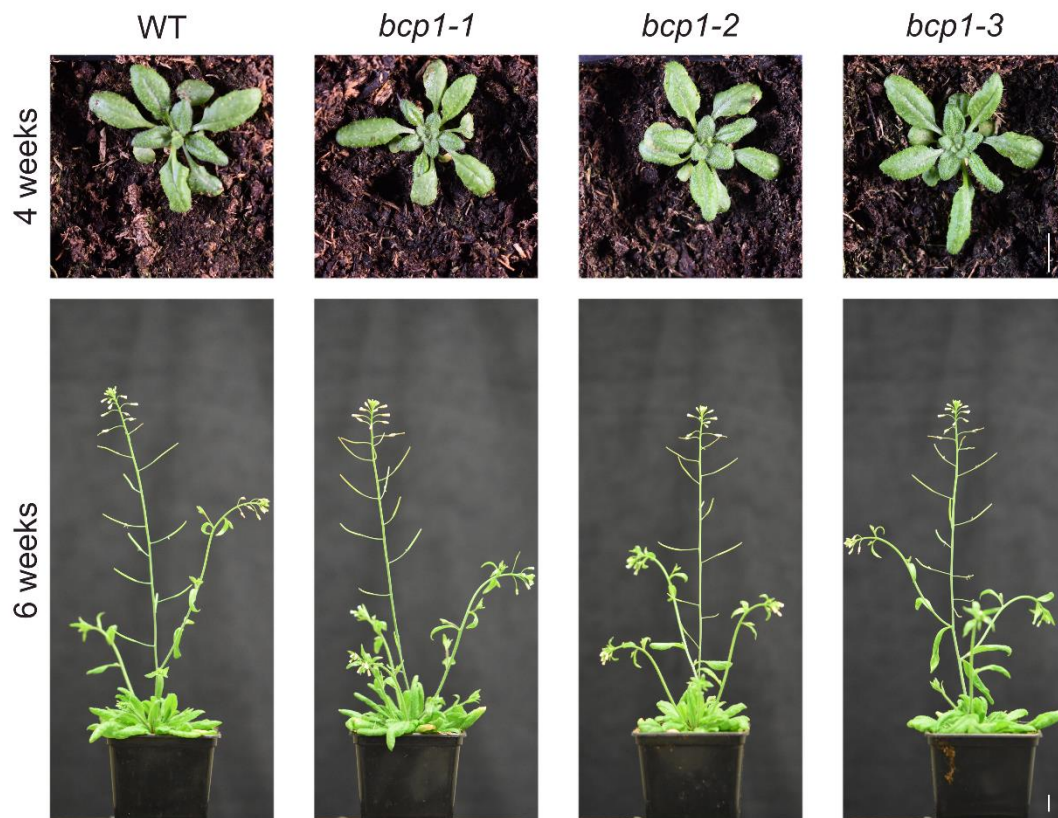

**Supplementary Figure 5** | Phenotypes of *BCP* mutant plants grown in soil. Homozygous *BCP* mutants were grown in soil and photographed at the rosette stage (4 weeks) and at seed setting (8 weeks). Scale bar = 1 cm.

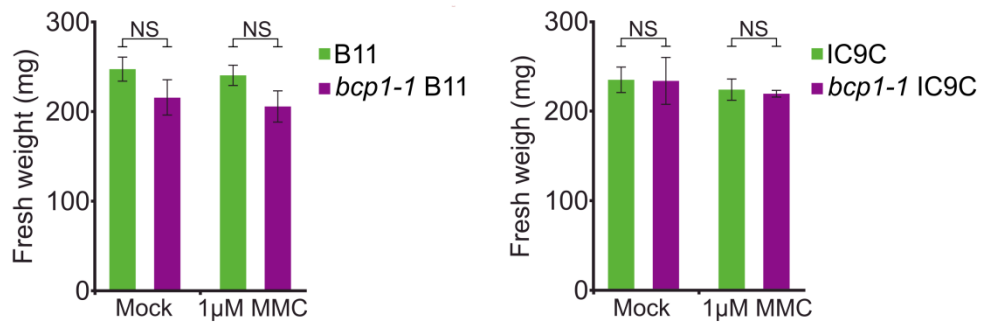

**Supplementary Figure 6** | Fresh weight measurements as the control for HR assays show no significant difference between control marker lines B11 and IC9C and marker lines in *bcp1-1* background. B11, *bcp1-1* B11, IC9C and *bcp1-1* IC9C seedlings were grown for 10 days on ½ MS (MOCK) or ½ MS with 1 µM MMC (MMC). Three replicates, consisting of 60 plants each, were measured for each group. The statistical significance of data was assessed by Mann-Whitney U-test. NS – not significantly different.

| Gene      | Name               | Sequence (5' to 3')                                                 | Use        |
|-----------|--------------------|---------------------------------------------------------------------|------------|
| At4g02110 | <i>bcp1-1_LP</i>   | TGTATTAGTGGACGCCTGGAATTG                                            | genotyping |
| At4g02110 | <i>bcp1-1_RP</i>   | AGTGTTTAACTCACTCGTGGGTGA                                            | genotyping |
| At4g02110 | <i>bcp1-2_LP</i>   | GATGGTCTTTCTCTTCTGGGG                                               | genotyping |
| At4g02110 | <i>bcp1-2_RP</i>   | CGCCAGAGACTGATACTTTGG                                               | genotyping |
| At4g02110 | <i>bcp1-3_LP</i>   | AGATTTGAATGGGATTCCAGG                                               | genotyping |
| At4g02110 | <i>bcp1-3_RP</i>   | CCAAAGTATCAGTCTCTGGCG                                               | genotyping |
| At2g41450 | <i>bcp2-1_LP</i>   | TTTGGGTCGGATTTCGGGATTTTT                                            | genotyping |
| At2g41450 | <i>bcp2-1_RP</i>   | AGTTGACAACCTTGAACGTTTGTAC                                           | genotyping |
| At4g03130 | <i>bcp3-1_LP</i>   | CACGCATCAAATCTAGCCAAG                                               | genotyping |
| At4g03130 | <i>bcp3-1_RP</i>   | ATCTTCAATTTCCCCACATCC                                               | genotyping |
| At3g21480 | <i>bcp4-1_LP</i>   | CTGCCTTGCATTCTTTTCAAG                                               | genotyping |
| At3g21480 | <i>bcp4-1_RP</i>   | TGTAAGACAACCTCGCCTCACC                                              | genotyping |
| o8474     |                    | ATAATAACGCTGCGGACATCTACATTTT                                        | genotyping |
| LBb1.3    |                    | ATTTTGCCGATTTTCGGAAC                                                | genotyping |
| At4g02110 | <i>proBCP1_FWD</i> | AAAAAGCAGGCTTATTAATAAATTTGTAAGTAA<br>AACCATTTGCTATAACAAGAATTTATAGCT | cloning    |
| At4g02110 | <i>proBCP1_REV</i> | AGAAAGCTGGGTTTTTTTTTTTTTGAAAAATTAG<br>GGTTTTATTAGGGTGGAGG           | cloning    |
| At4g02110 | attB1 adapter      | GGGGACAAGTTTGTACAAAAAAGCAGGCT                                       | cloning    |
| At4g02110 | attB2 adapter      | GGGGACCACTTTGTACAAGAAAGCTGGGT                                       | cloning    |
| At4g02110 | <i>BCP1_FWD</i>    | TGCAGAGGTGGAAATTACGGTGCTAG                                          | RT-qPCR    |
| At4g02110 | <i>BCP1_REV</i>    | TTTACCTACACCAGCCTCCCTTTTGC                                          | RT-qPCR    |
| At2g41450 | <i>BCP2_FWD</i>    | TTCATTGGTTTTGAAGTCCACGCTTG                                          | RT-qPCR    |
| At2g41450 | <i>BCP2_REV</i>    | GTGTGTATATGTTACAGCAGCAAGAGGT                                        | RT-qPCR    |
| At4g03130 | <i>BCP3_FWD</i>    | CCCCATTTCAAGTGCTCTACGACGAT                                          | RT-qPCR    |
| At4g03130 | <i>BCP3_REV</i>    | AGCAGCGACACTTCCATCTTCATCAT                                          | RT-qPCR    |
| At3g21480 | <i>BCP4_FWD</i>    | TGGGCTCGTTCTGATTCCAAACTGTT                                          | RT-qPCR    |
| At3g21480 | <i>BCP4_REV</i>    | ATCATTCCCTAAAAGTCCGCTTCAC                                           | RT-qPCR    |
| At1g69960 | <i>PP2A_FWD</i>    | TAACGTGGCCAAAATGATGC                                                | RT-qPCR    |
| At1g69960 | <i>PP2A_REV</i>    | GTTCTCCACAACCGCTTGGT                                                | RT-qPCR    |

**Supplementary Table 1 | Oligonucleotides used in this study.**
